# Supplementary material for: Multifunctional single-drug loaded nanoparticles for enhanced cancer treatment with low toxicity in vivo
Source: Royal Society of Chemistry journal article supplement (doi:10.1039/c5ra26372g), 2016-01-01
Supplement: c5ra26372g1.pdf [file c5ra26372g1.pdf]

## Supporting Information

### **Multifunctional single-drug loaded nanoparticles for enhanced cancer treatment with low toxicity *in vivo***

Yuwei Cong, Zigui Wang, Shasha He, Dongfang Zhou,\* Jizhen Li, Zhigang Xie, Xuesi Chen, Xiabin Jing, Yubin Huang

#### ***Contents***

*Scheme S1.* Synthesis of Z-DMC-OXA(N<sub>3</sub>)

*Figure S1.* IR spectra of Z-DMC-OXA(N<sub>3</sub>)

*Figure S2.* <sup>1</sup>H NMR spectra of Z-DMC-OXA(N<sub>3</sub>) (DMSO-d<sub>6</sub>)

*Figure S3.* ESI-MS spectra of Z-DMC-OXA(N<sub>3</sub>)

*Scheme S2.* Synthesis of P-Z-DMC-OXA(N<sub>3</sub>)

*Figure S4.* <sup>1</sup>H NMR spectra of mPEG-b-P(LA-co-MPD) (CDCl<sub>3</sub>)

*Figure S5.* Cell viability of HeLa cells without any drug in the presence of UVA irradiation.

*Figure S6.* The HeLa cell images under different drug treatment

*Figure S7.* TUNEL staining of H22 tumors from mice

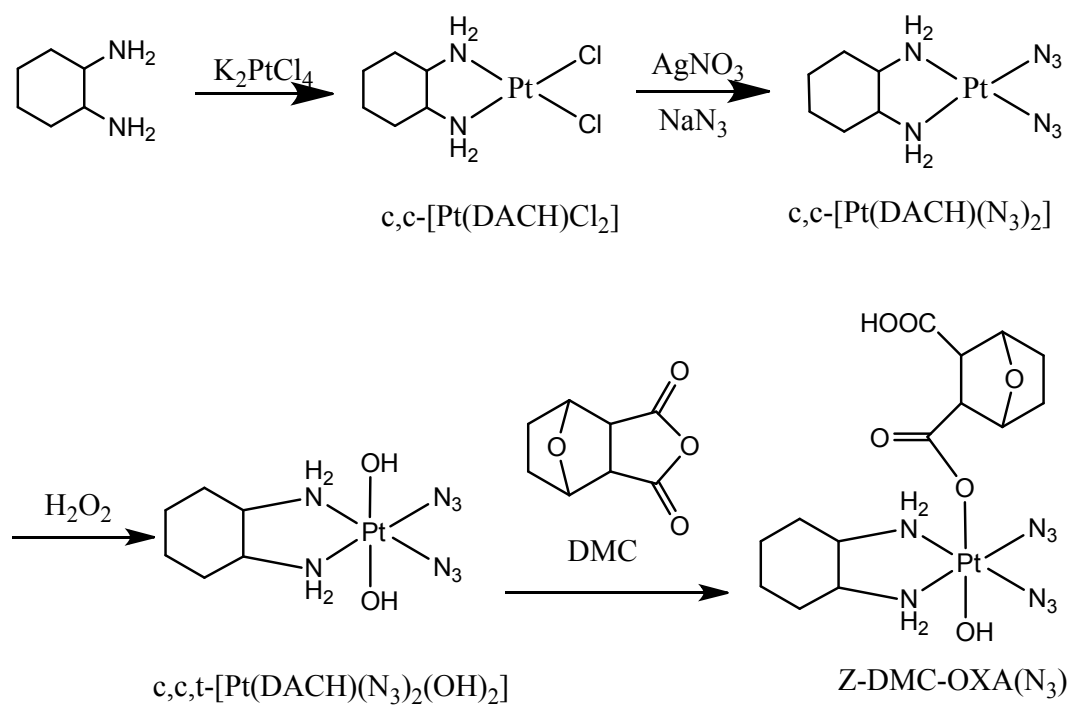

**Scheme S1.** Synthesis of Z-DMC-OXA(N<sub>3</sub>).

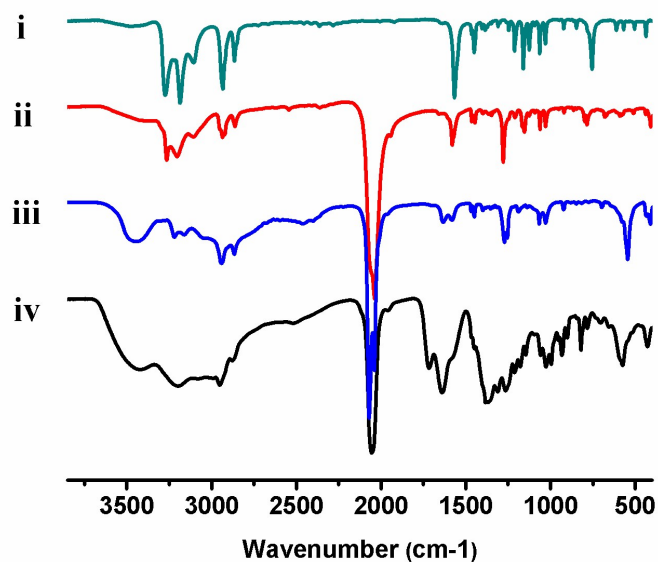

**Fig. S1** IR spectra of  $\text{c,c-[Pt(DACH)Cl}_2\text{]}$  (i),  $\text{c,c-[Pt(DACH)(N}_3\text{)}_2\text{]}$  (ii),  $\text{c,c,t-[Pt(DACH)(N}_3\text{)}_2\text{(OH)}_2\text{]}$  (iii) and Z-DMC-OXA(N<sub>3</sub>) (iv).

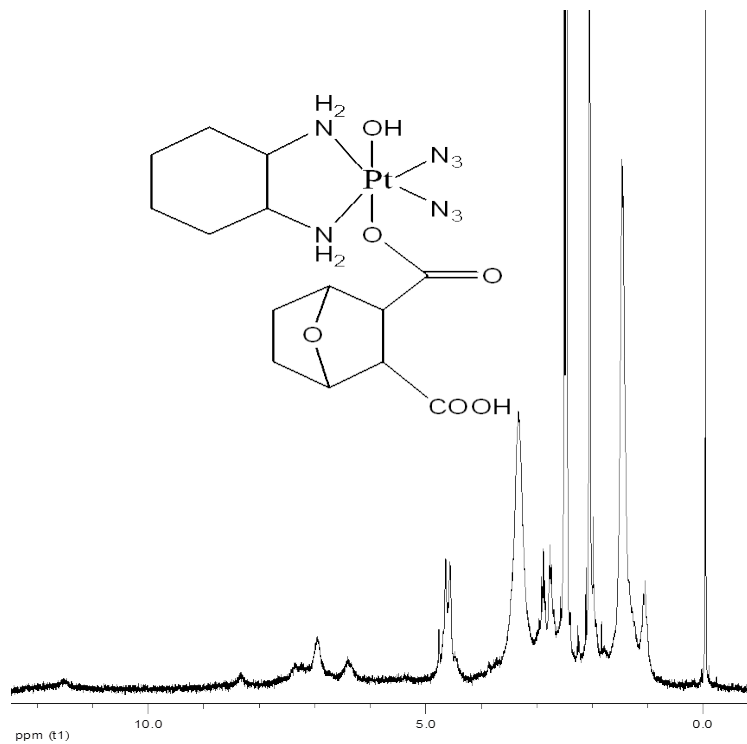

**Fig. S2** <sup>1</sup>H NMR spectra of Z-DMC-OXA(N<sub>3</sub>) (DMSO- d<sub>6</sub>).

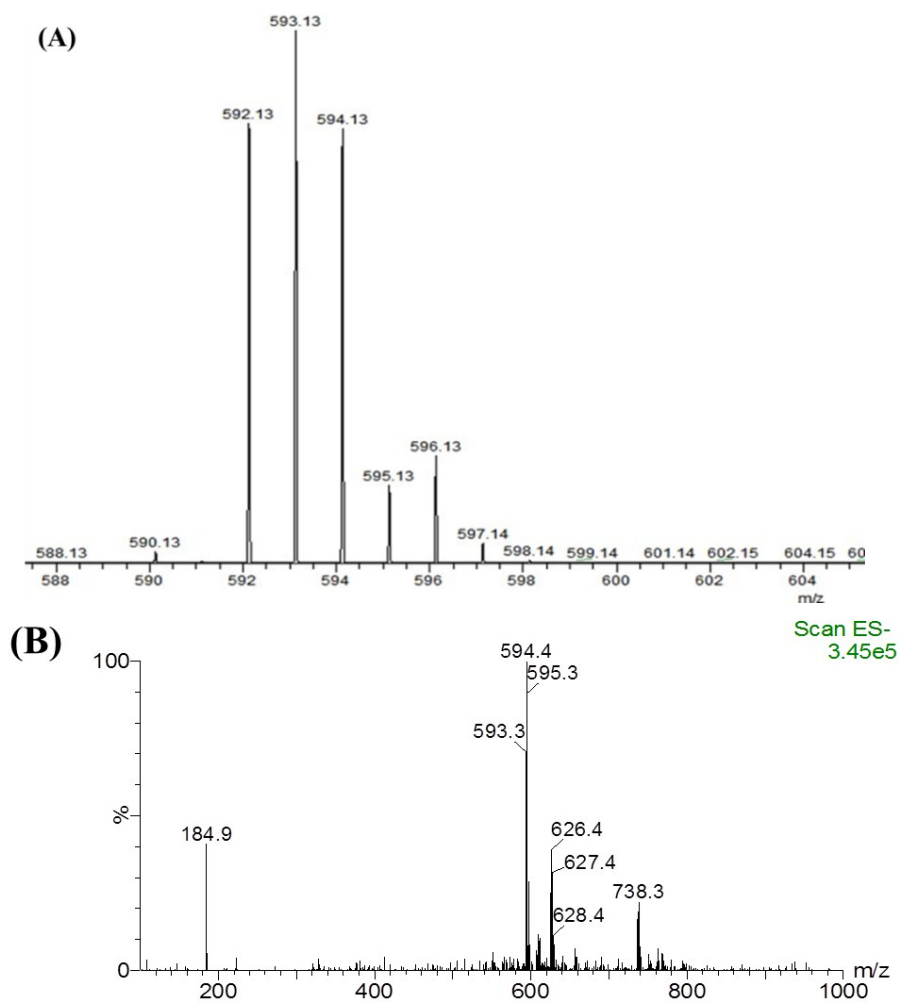

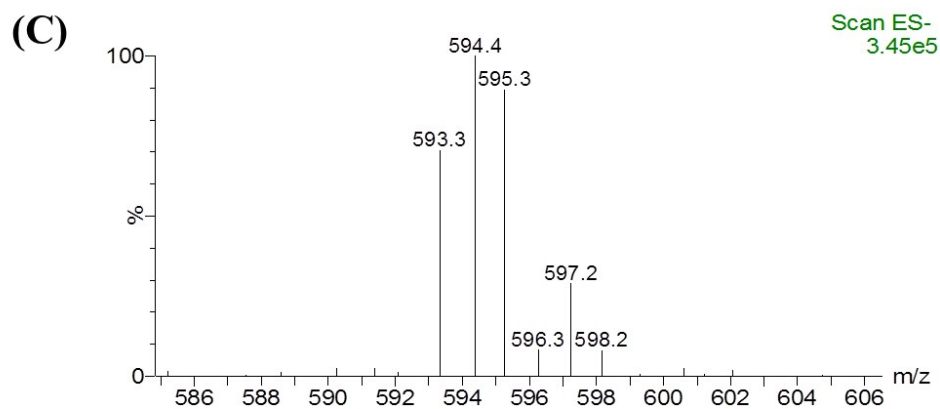

**Fig. S3** Theoretical isotope pattern (A), experimental results (B) and (C) of Z-DMC-OXA(N<sub>3</sub>) a measured by ESI-MS (negative mode).

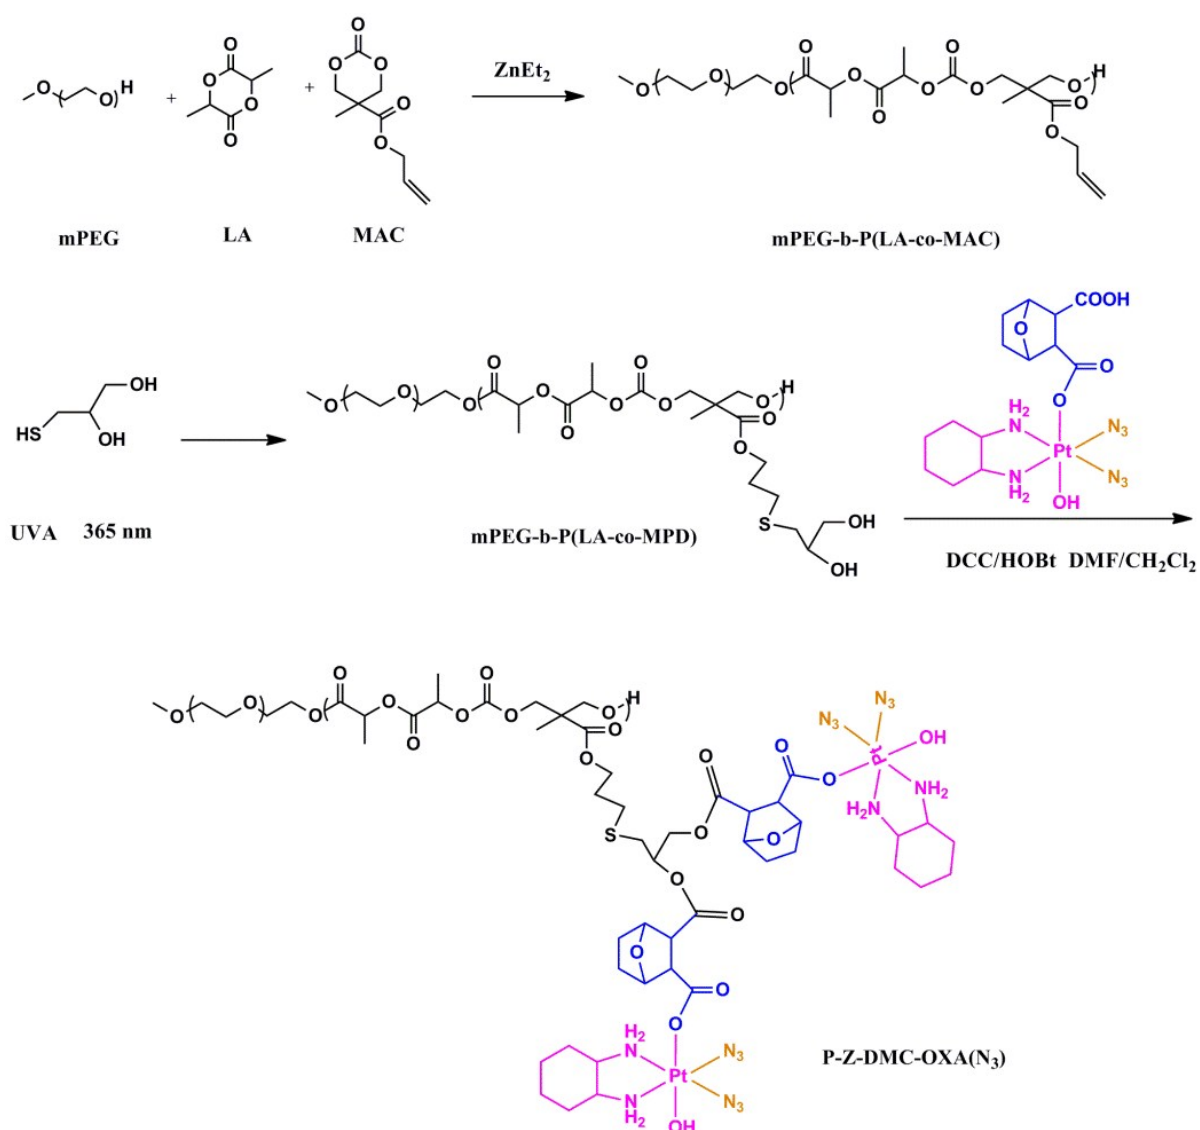

**Scheme S2.** Synthesis of P-Z-DMC-OXA(N<sub>3</sub>).

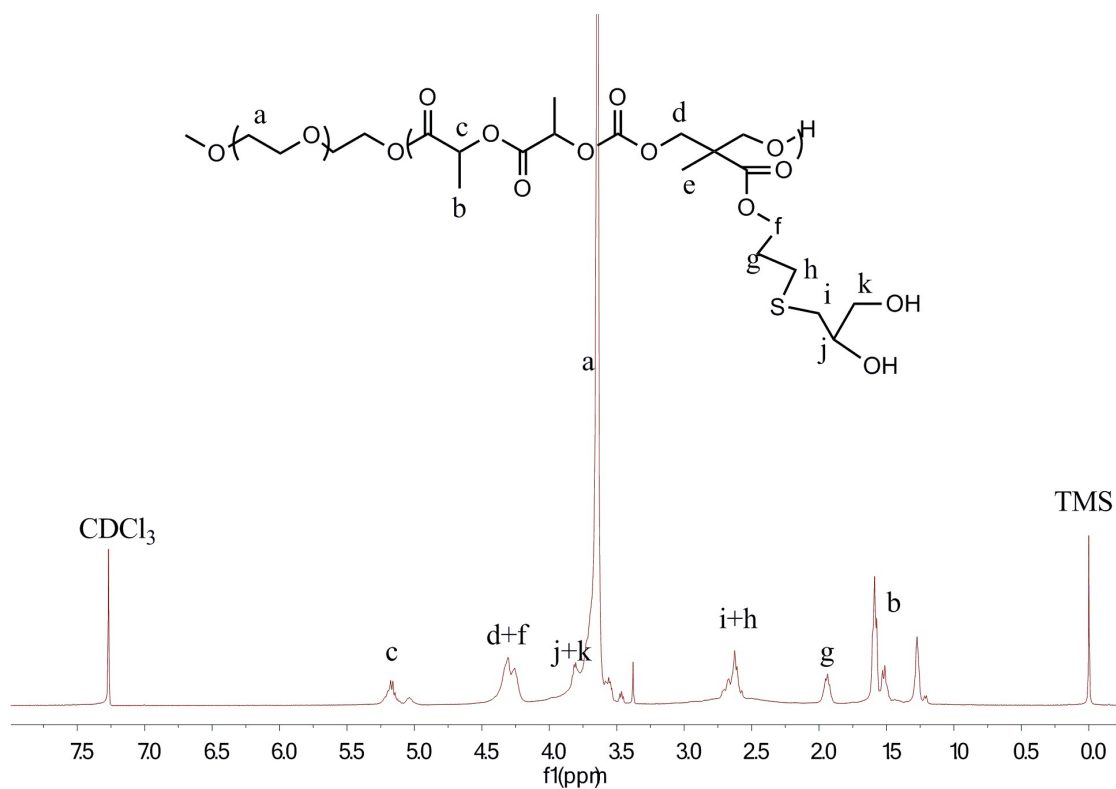

**Fig. S4**  $^1\text{H}$  NMR spectra of mPEG-b-P(LA-co-MPD) ( $\text{CDCl}_3$ ).

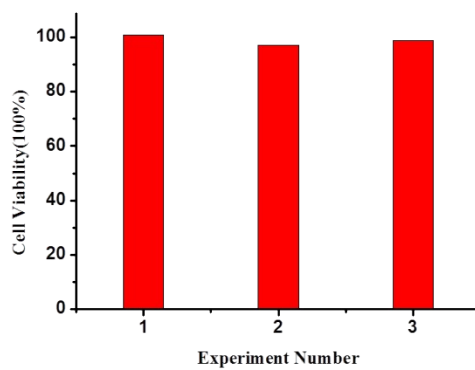

**Fig. S5** Cell viability of HeLa cells without any drug in the presence of UVA irradiation.

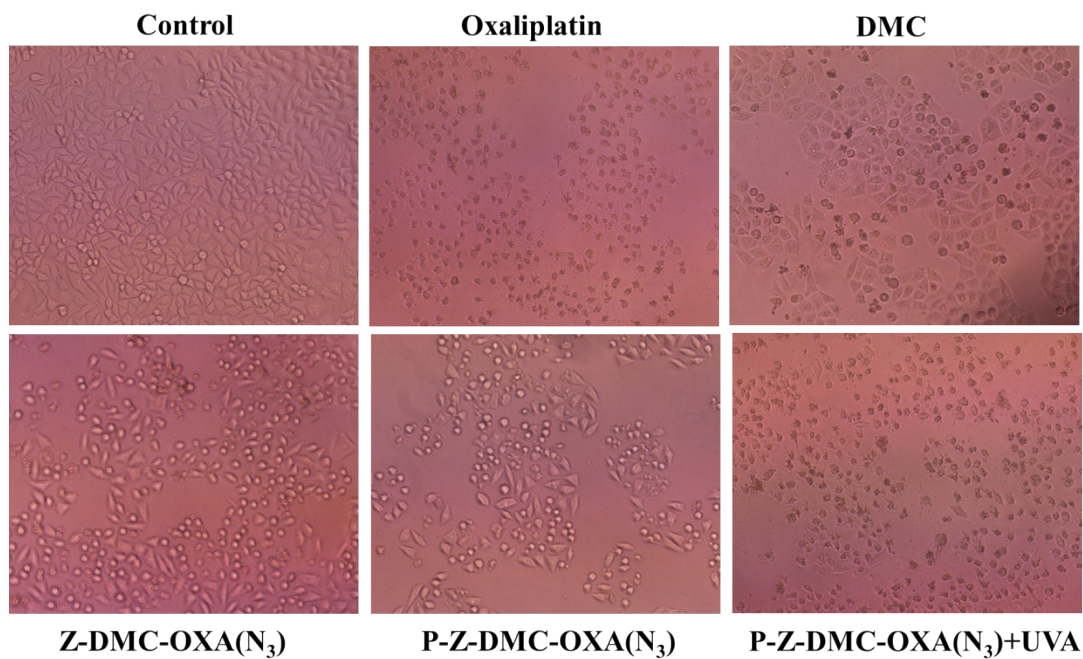

**Fig. S6** Images of HeLa cells under different drug treatment at a concentration of 54  $\mu$ M (Pt or DMC) for 72 h.

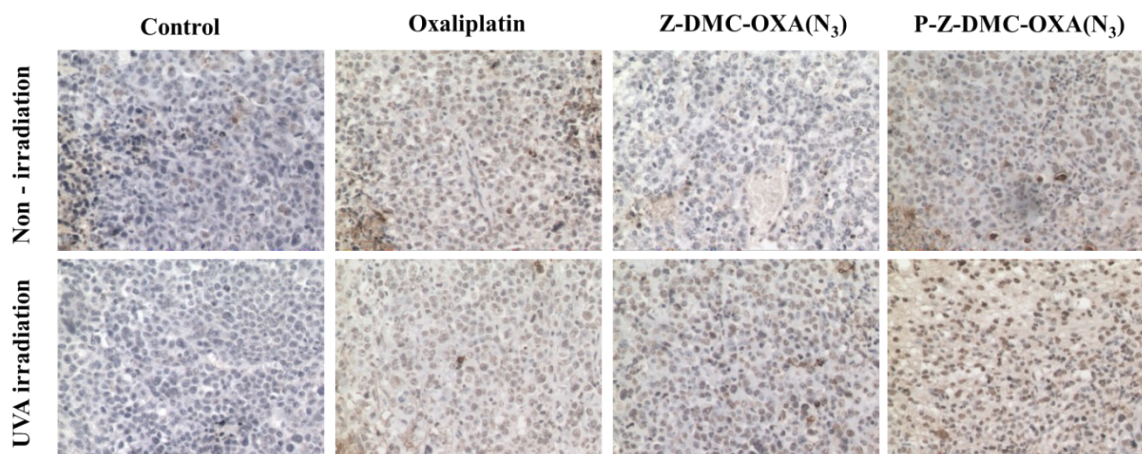

**Fig. S7** TUNEL staining of H22 tumors from mice after different drug treatment on day 29.
